# Supplementary material for: Rhein Induces Apoptosis in Human Breast Cancer Cells
Source: PubMed Central journal article supplement (PMC3189565; doi:10.1155/2012/952504), 2011-10-05
Supplement: 952504.f1.pdf [file 952504.f1.pdf]

Supplemental Figure

Supplemental Fig. 1.

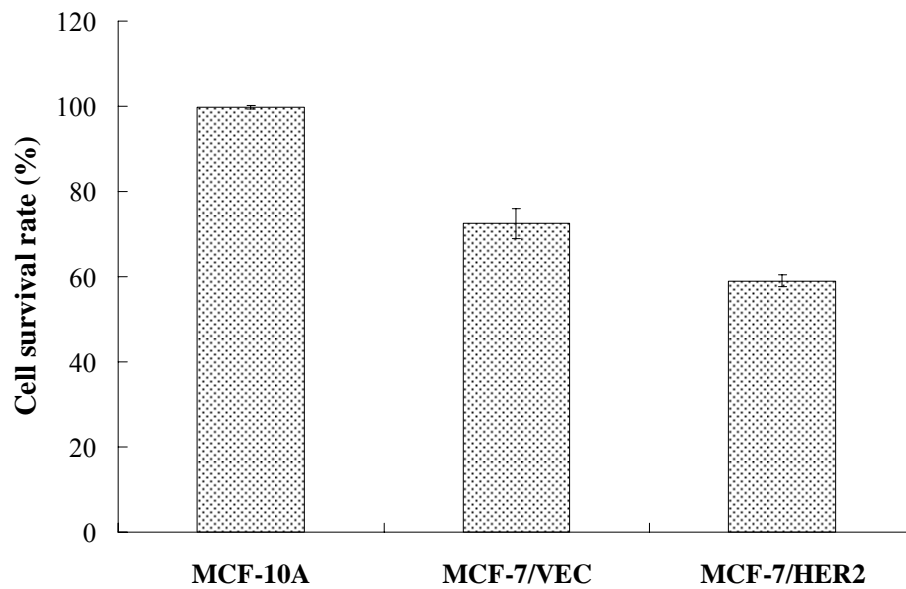

Supplemental Fig. 1. Cytotoxic effect of rhein on normal breast MCF-10A cells, and breast cancer MCF-7/VEC and MCF-7/HER2 cells. Cells were plated in 96-well plates ( $5 \times 10^4$  cells/well) and then treated with  $20 \mu\text{g/ml}$  rhein. After treatment for 48 h, cell growth was examined using MTT assay.  $\text{OD}_{570-630}$  in each well was measured with a micro-ELISA reader.
